# Supplementary material for: Nb-doped amorphous titanium oxide compact layer for formamidinium-based high efficiency perovskite solar cells by low-temperature fabrication
Source: Royal Society of Chemistry journal article supplement (doi:10.1039/c8ta02540a), 2018-01-01
Supplement: c8ta02540a1.pdf [file c8ta02540a1.pdf]

## Supporting Information

Nb-doped amorphous titanium oxide compact layer for formamidinium-based high efficiency perovskite solar cells by low-temperature fabrication

*Youhei Numata,<sup>1†\*</sup> Ryo Ishikawa,<sup>2</sup> Yoshitaka Sanehira,<sup>1</sup> Atsushi Kogo,<sup>1‡</sup> Hajime Shirai,<sup>2</sup> and Tsutomu Miyasaka<sup>1\*</sup>*

<sup>1</sup>Graduate School of Engineering, Toin University of Yokohama, 1614 Kurogane-cho, Aoba, Yokohama, Kanagawa, 225-8503 Japan.

<sup>2</sup>Graduate School of Science and Engineering, Saitama University, Sakura-ku, Saitama, 338-8570 Japan.

\*Dr. Youhei Numata (E-mail: [y\\_numata@dsc.rcast.u-tokyo.ac.jp](mailto:y_numata@dsc.rcast.u-tokyo.ac.jp)). \*Prof. Tsutomu Miyasaka (E-mail: [miyasaka@toin.ac.jp](mailto:miyasaka@toin.ac.jp)).

†Present affiliation, Research Center for Advanced Science and Technology (RCAST), The University of Tokyo

‡Present affiliation, National Institute of Advanced Industrial Science and Technology (AIST)

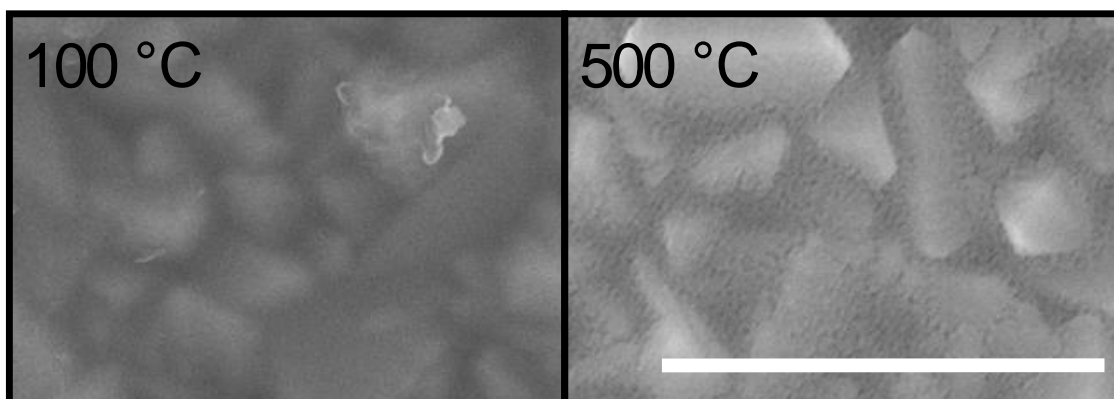

**Figure S1.** Surface SEM images of  $\text{TiO}_x$  CLs dried at  $100\text{ }^\circ\text{C}$  (left) and sintered at  $500\text{ }^\circ\text{C}$  (right), respectively. Scale bar =  $1\text{ }\mu\text{m}$ .

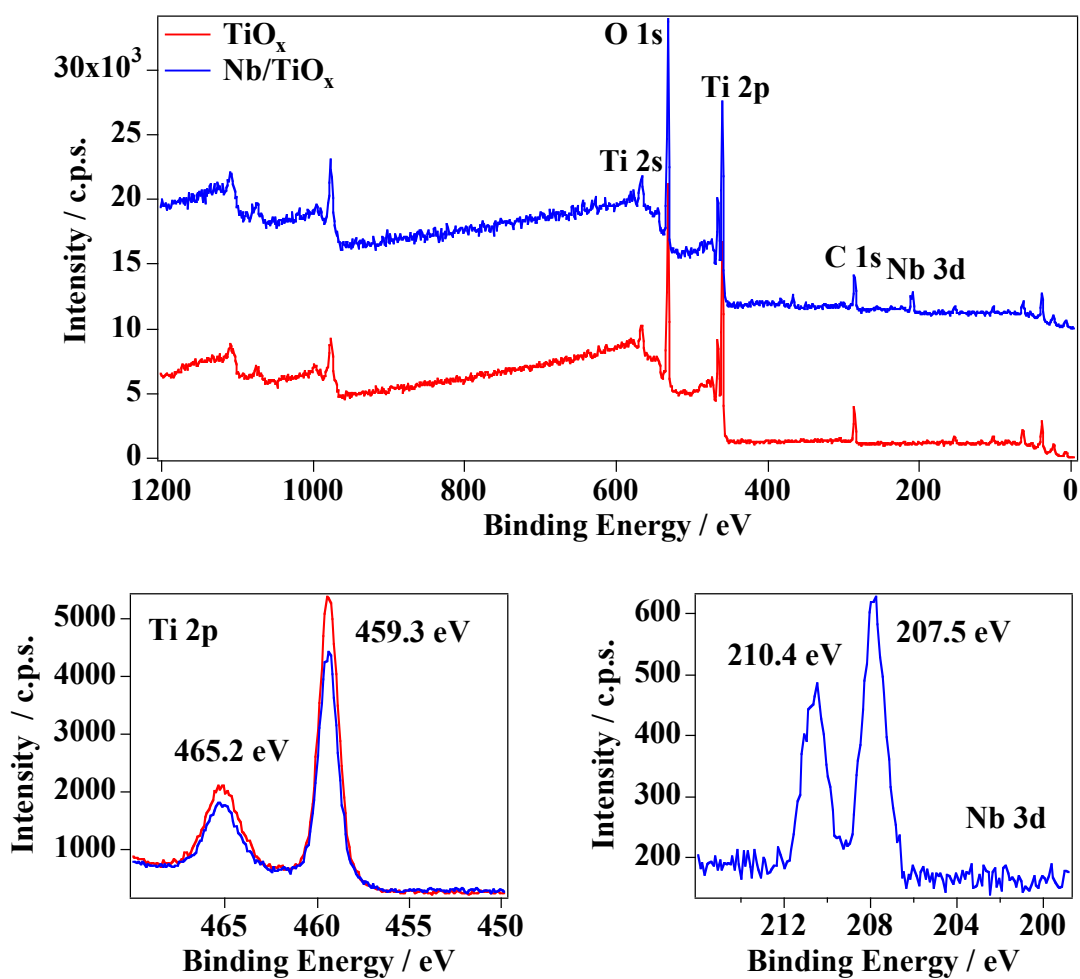

**Figure S2.** XPS spectra of  $\text{TiO}_x$  and (5%)  $\text{Nb/TiO}_x$  CL annealed at  $150\text{ }^\circ\text{C}$ .

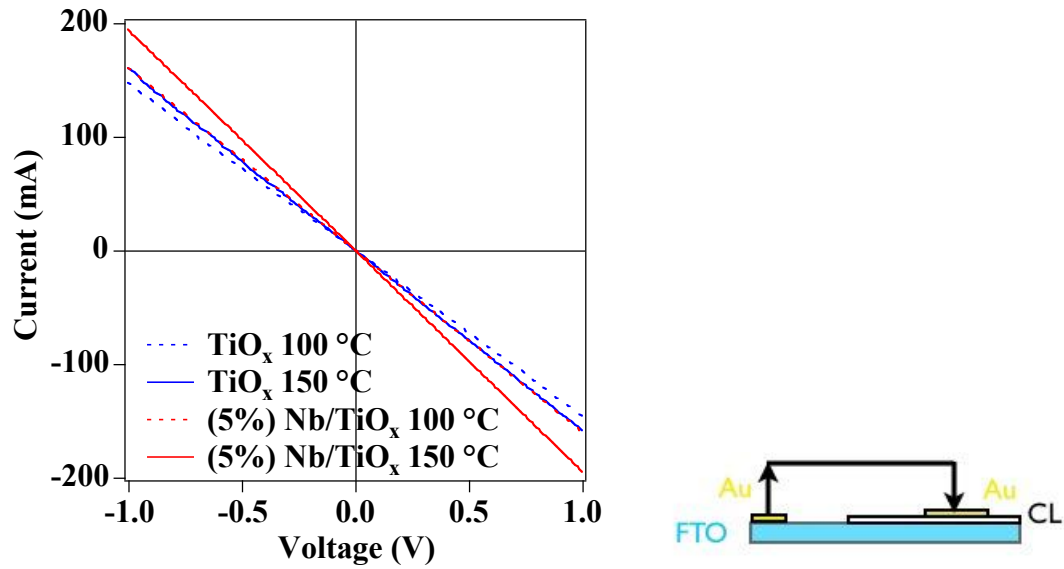

**Figure S3.** *I-V* curves of FTO/CL (TiO<sub>x</sub> and (5%) Nb/TiO<sub>x</sub>)/Au device; CL thickness is approximately 40 nm, and schematic illustration of the measured device.

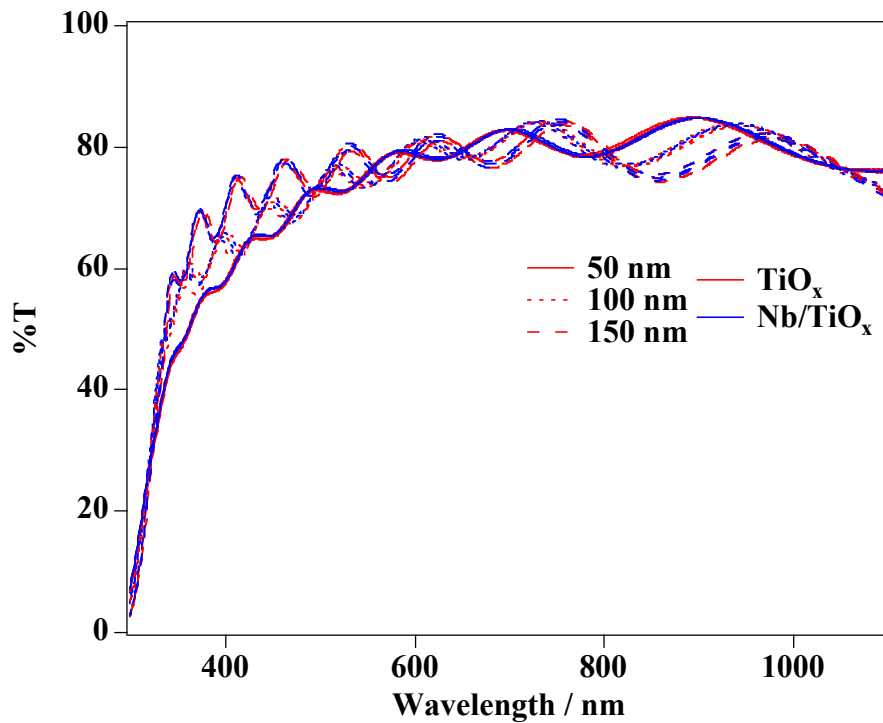

**Figure S4.** Transmittances of TiO<sub>x</sub> and (5%) Nb/TiO<sub>x</sub> CL on FTO substrates dried at 100, 130, and 150 °C with the thickness of 50, 100, and 150 nm, respectively.

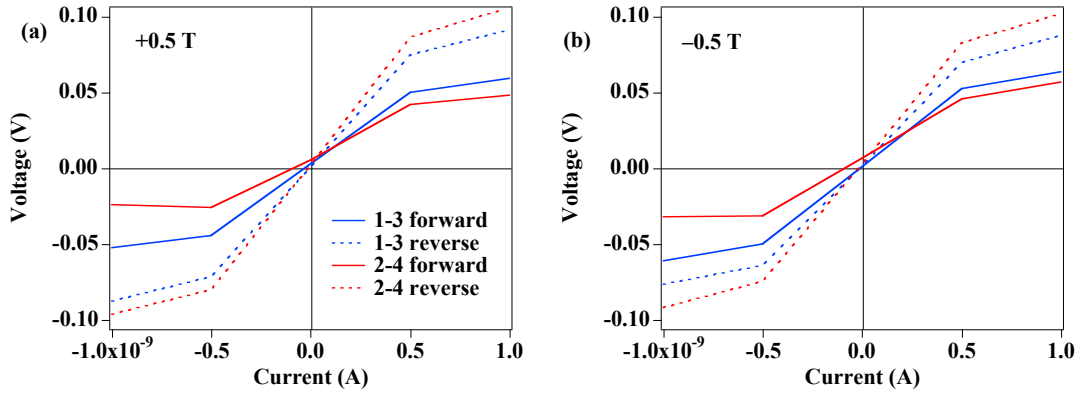

**Figure S5.** Hall-effect measurement data of (5%) Nb/TiO<sub>x</sub> CL (film thickness: 7 nm) on a 1.25 × 1.25 cm<sup>2</sup> glass substrate measured under (a) +0.5 T and (b) –0.5 T magnetic field, respectively. Electrodes contacted at diagonal corners (1-3 and 2-4).

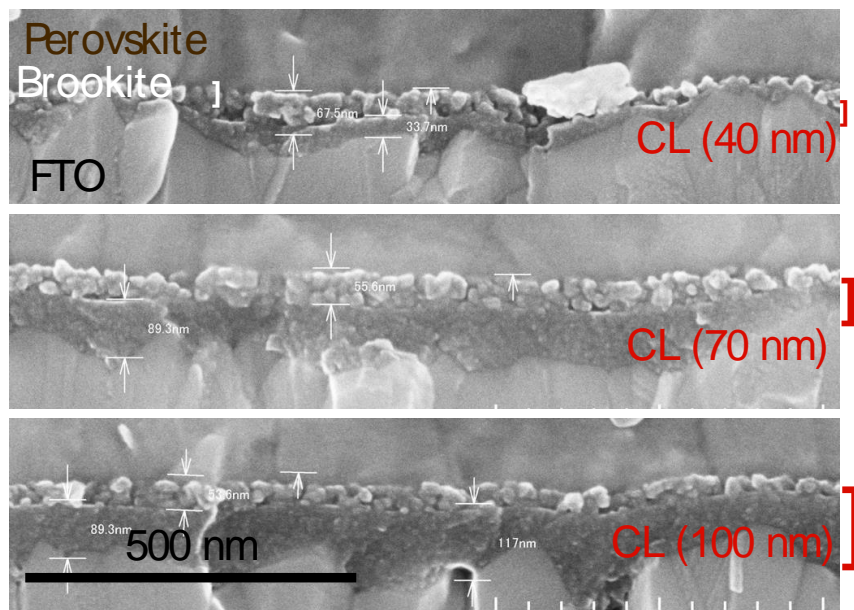

**Figure S6.** Cross-sectional SEM images of (FAPbI<sub>3</sub>)<sub>0.85</sub>(MAPbBr<sub>3</sub>)<sub>0.15</sub> PSCs based on (5%) Nb/TiO<sub>x</sub> CLs with different thickness; 40, 70, and 100 nm. Black scale bar: 500 nm.

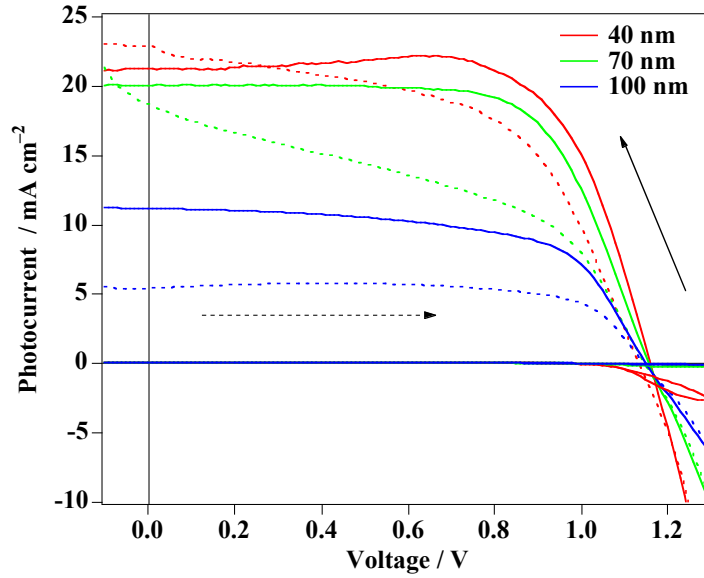

**Figure S7.** *J-V* curves of PSCs of  $(\text{FAPbI}_3)_{0.85}(\text{MAPbBr}_3)_{0.15}$  based on (5%)  $\text{Nb/TiO}_x$  CLs with different thickness; 40 (red), 70 (green), and 100 nm (blue). Broken line: forward scans and line: reverse scans.

**Table S1.** Photovoltaic parameters in reverse scans ( $V_{\text{OC}} \rightarrow J_{\text{SC}}$ ) of PSCs based on (5%)  $\text{Nb/TiO}_x$  CL with different thickness

| CL thickness (nm) | scan direction | $J_{\text{SC}}$ (mA $\text{cm}^{-2}$ ) | $V_{\text{OC}}$ (V) | $FF$                | $\eta$ (%)         | No. of cells    |
|-------------------|----------------|----------------------------------------|---------------------|---------------------|--------------------|-----------------|
| 40                | forward        | 22.71±0.28<br>(22.78)                  | 1.14±0.01<br>(1.14) | 0.50±0.04<br>(0.54) | 13.0±0.9<br>(14.1) | 6               |
|                   | reverse        | 20.56±1.06<br>(21.26)                  | 1.16±0.01<br>(1.16) | 0.69±0.02<br>(0.70) | 16.5±0.6<br>(17.3) |                 |
| 70                | forward        | 18.25±1.57<br>(20.46)                  | 1.13±0.01<br>(1.14) | 0.41±0.04<br>(0.45) | 8.5±1.4<br>(10.4)  | 6               |
|                   | reverse        | 17.10±2.53<br>(20.00)                  | 1.15±0.01<br>(1.16) | 0.73±0.07<br>(0.68) | 14.2±1.3<br>(15.7) |                 |
| 100               | forward        | 5.29±0.13<br>(5.38)                    | 1.13±0.03<br>(1.15) | 0.62±0.15<br>(0.73) | 3.7±1.1<br>(4.5)   | 2 <sup>a)</sup> |
|                   | reverse        | 9.93±1.68<br>(11.12)                   | 1.13±0.02<br>(1.13) | 0.60±0.02<br>(0.62) | 6.8±1.6<br>(7.9)   |                 |

Scan direction: forward  $J_{\text{SC}} \rightarrow V_{\text{OC}}$  and reverse:  $V_{\text{OC}} \rightarrow J_{\text{SC}}$ . In parentheses, the parameters of the best cell. Cell active area is  $5 \times 5 \text{ mm}^2$  defined by black mask. <sup>a)</sup> Because of high resistance, few cells cannot be estimated their conversion efficiencies, e.g.,  $FF > 1$ .

**Table S2.** Photovoltaic parameters of  $(\text{FAPbI}_3)_{0.85}(\text{MAPbBr}_3)_{0.15}$  PSCs based on Nb/TiO<sub>x</sub> CLs with different Nb doping ratio dried at 150 °C

| Compact layer    | scan direction <sup>a)</sup> | $J_{\text{sc}}$ (mA cm <sup>-2</sup> ) | $V_{\text{oc}}$ (V) | $FF$                | $\eta$ (%)         | No. of cells |
|------------------|------------------------------|----------------------------------------|---------------------|---------------------|--------------------|--------------|
| TiO <sub>x</sub> | forward                      | 21.48±0.94<br>(21.63)                  | 1.10±0.02<br>(1.13) | 0.54±0.15<br>(0.67) | 12.7±3.4<br>(16.4) | 20           |
|                  | reverse                      | 20.30±0.49<br>(20.51)                  | 1.13±0.02<br>(1.16) | 0.74±0.05<br>(0.79) | 17.3±1.4<br>(19.1) |              |
| Nb 1%            | forward                      | 22.20±0.74<br>(23.11)                  | 1.08±0.01<br>(1.08) | 0.56±0.04<br>(0.63) | 13.5±1.2<br>(15.6) | 14           |
|                  | reverse                      | 21.79±0.23<br>(22.30)                  | 1.12±0.01<br>(1.13) | 0.74±0.02<br>(0.76) | 17.9±0.8<br>(19.2) |              |
| Nb 2%            | forward                      | 22.06±0.60<br>(22.28)                  | 1.05±0.02<br>(1.04) | 0.53±0.07<br>(0.63) | 12.3±1.8<br>(14.6) | 16           |
|                  | reverse                      | 21.68±0.69<br>(22.31)                  | 1.10±0.02<br>(1.13) | 0.68±0.07<br>(0.74) | 16.3±2.1<br>(18.4) |              |
| Nb 3%            | forward                      | 21.68±0.52<br>(21.66)                  | 1.07±0.02<br>(1.09) | 0.60±0.04<br>(0.64) | 13.9±1.1<br>(15.0) | 18           |
|                  | reverse                      | 21.27±0.61<br>(21.90)                  | 1.11±0.02<br>(1.12) | 0.73±0.04<br>(0.75) | 17.2±1.2<br>(18.4) |              |
| Nb 4%            | forward                      | 22.08±0.56<br>(22.26)                  | 1.09±0.02<br>(1.12) | 0.59±0.07<br>(0.68) | 14.2±2.0<br>(17.0) | 15           |
|                  | reverse                      | 21.75±0.64<br>(22.36)                  | 1.13±0.01<br>(1.14) | 0.73±0.04<br>(0.77) | 17.9±1.2<br>(19.6) |              |
| Nb 5%            | forward                      | 21.29±0.89<br>(22.33)                  | 1.08±0.01<br>(1.09) | 0.49±0.07<br>(0.57) | 11.5±1.9<br>(13.9) | 14           |
|                  | reverse                      | 20.64±0.97<br>(20.71)                  | 1.12±0.01<br>(1.13) | 0.73±0.04<br>(0.77) | 16.8±1.3<br>(18.1) |              |

Scan direction: forward  $J_{\text{sc}} \rightarrow V_{\text{oc}}$  and reverse:  $V_{\text{oc}} \rightarrow J_{\text{sc}}$ . In parentheses, the parameters of the best cell. Cell active area is  $5 \times 5 \text{ mm}^2$  defined by black mask.

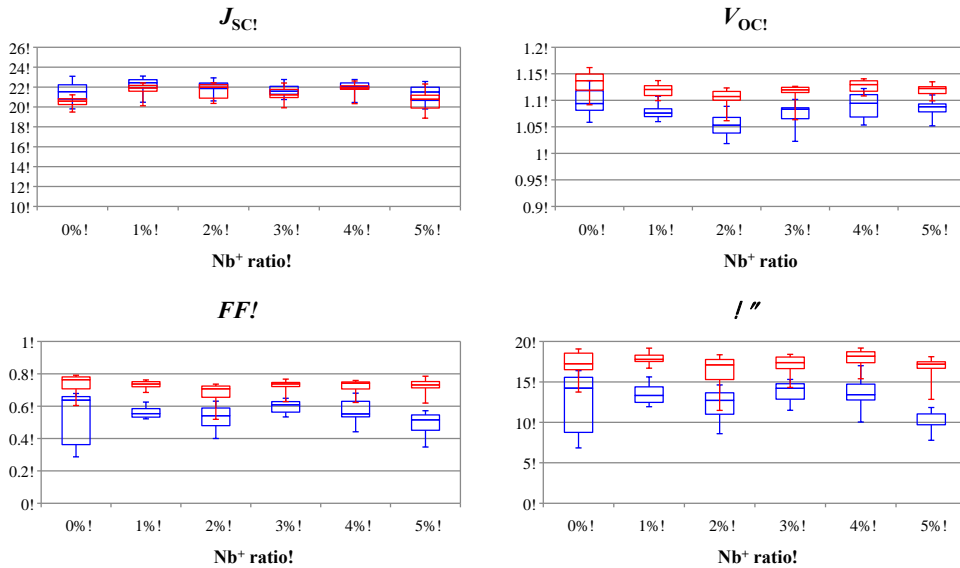

**Figure S8.** Nb-doping ratio dependency of photovoltaic parameters of  $(\text{FAPbI}_3)_{0.85}(\text{MAPbBr}_3)_{0.15}$  PSCs based on Nb/TiO<sub>x</sub> CLs dried at 150 °C.

**Table S3.** Photovoltaic parameters in reverse scans ( $V_{OC} \rightarrow J_{SC}$ ) of PSCs based on  $FA_{0.85}Cs_{0.15}PbI_3$  perovskite annealed at different temperatures.

| Anneal temp. | No. of cells | $J_{SC}$ (mA cm <sup>-2</sup> ) | $V_{OC}$ (V) | $FF$      | $\eta$ (%) |
|--------------|--------------|---------------------------------|--------------|-----------|------------|
| 100°C        | 6 cells      | 19.56±0.22                      | 0.93±0.02    | 0.44±0.02 | 8.1±0.5    |
|              | best eff.    | 19.70                           | 0.95         | 0.48      | 9.0        |
| 110°C        | 6 cells      | 19.43±0.29                      | 0.98±0.02    | 0.52±0.04 | 10.0±1.0   |
|              | best eff.    | 19.12                           | 1.00         | 0.59      | 11.3       |
| 120°C        | 6 cells      | 21.25±0.27                      | 0.97±0.04    | 0.52±0.03 | 10.8±1.0   |
|              | best eff.    | 21.52                           | 1.01         | 0.55      | 11.9       |
| 130°C        | 12 cells     | 21.43±0.66                      | 1.00±0.04    | 0.58±0.04 | 12.6±1.4   |
|              | best eff.    | 22.21                           | 1.03         | 0.64      | 14.6       |
| 140°C        | 6 cells      | 20.33±0.76                      | 1.01±0.03    | 0.61±0.04 | 12.6±1.3   |
|              | best eff.    | 20.01                           | 1.04         | 0.64      | 14.0       |
| 150°C        | 6 cells      | 19.53±0.27                      | 1.03±0.02    | 0.61±0.07 | 12.3±1.6   |
|              | best eff.    | 19.81                           | 1.04         | 0.66      | 13.5       |
| 160°C        | 6 cells      | 17.96±1.12                      | 0.97±0.05    | 0.53±0.10 | 9.2±2.0    |
|              | best eff.    | 19.59                           | 1.03         | 0.62      | 12.4       |
| 170°C        | 6 cells      | 17.44±0.47                      | 0.99±0.02    | 0.57±0.03 | 10.0±0.8   |
|              | best eff.    | 18.08                           | 1.01         | 0.60      | 10.9       |

The PSCs are prepared on a substrate: FTO/high-temperature sintered TiO<sub>2</sub> CL/low-temperature dried brookite mesoporous layer. Scan direction: forward  $J_{SC} \rightarrow V_{OC}$  and reverse:  $V_{OC} \rightarrow J_{SC}$ . In parentheses, the parameters of the best cell. Cell active area is  $5 \times 5$  mm<sup>2</sup> defined by black mask.

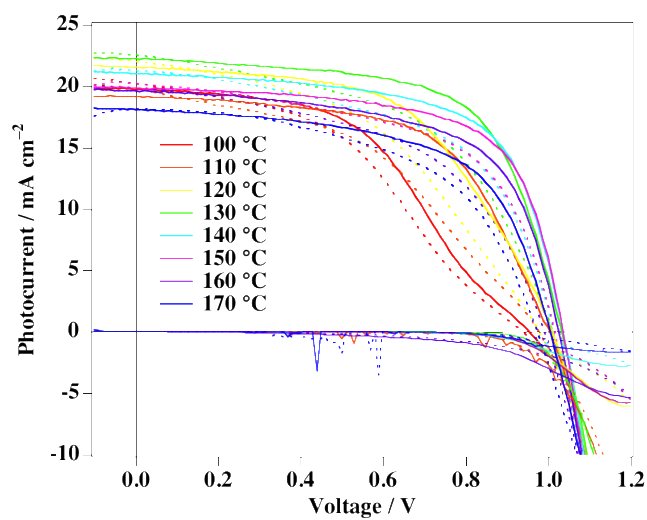

**Figure S9.** *J-V* curves of  $\text{FA}_{0.85}\text{Cs}_{0.15}\text{PbI}_3$  based PSCs annealed at different temperatures. Forward (broken line) and reverse (solid line) scans.

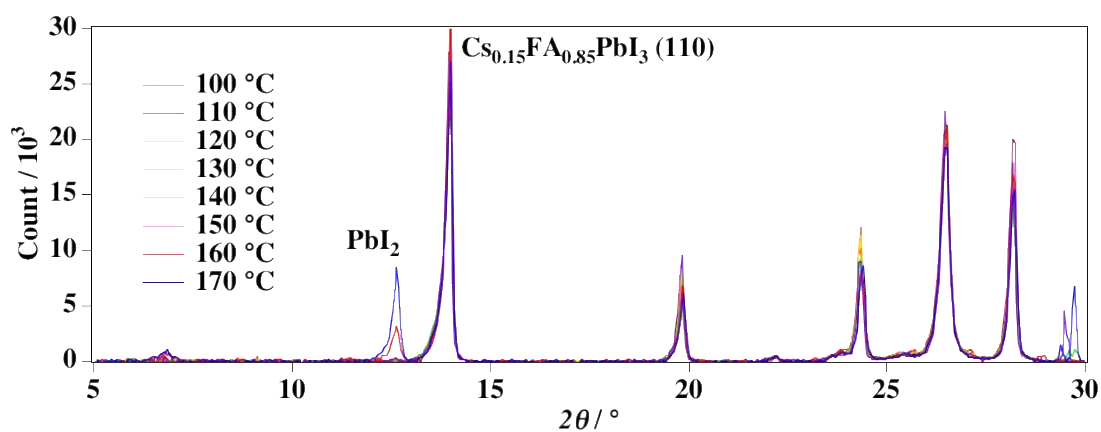

**Figure S10.** XRD chart of  $\text{FA}_{0.85}\text{Cs}_{0.15}\text{PbI}_3$  perovskite film on mesoporous substrate prepared by different anneal temperatures.



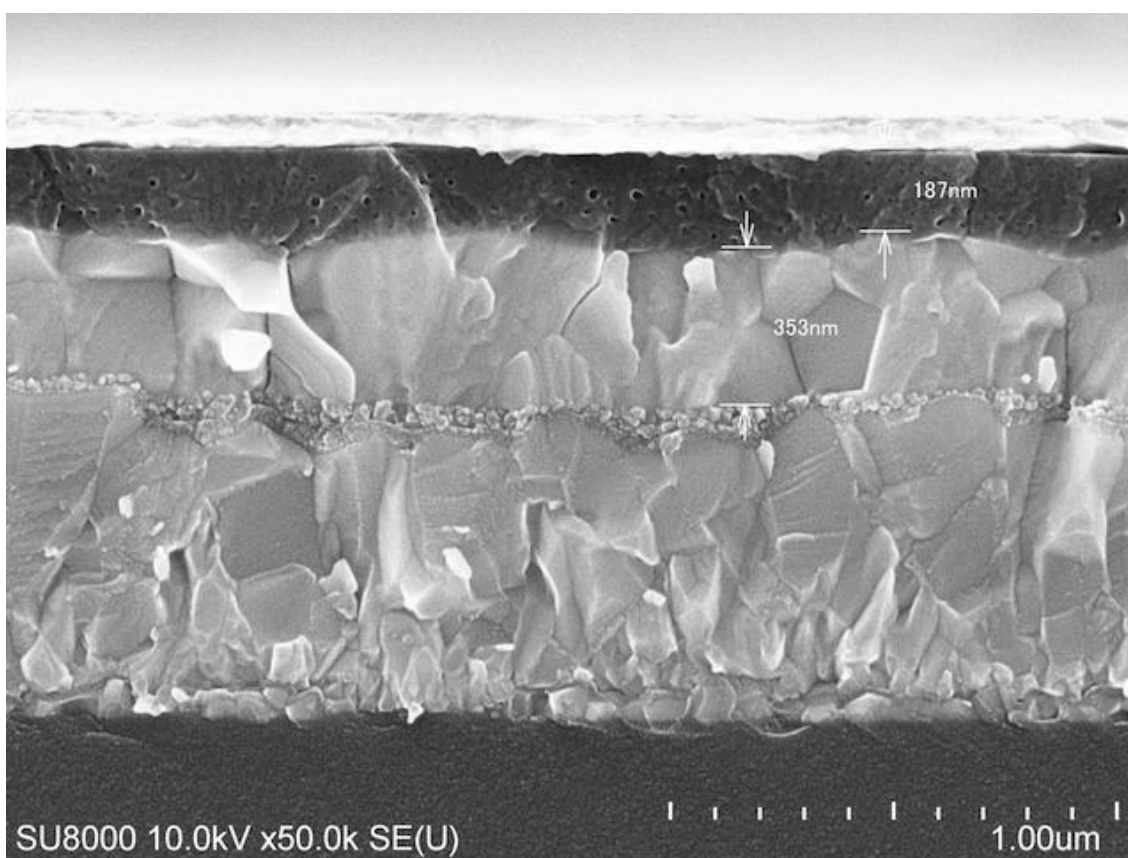

**Figure S11.** Cross-sectional SEM image of  $\text{FA}_{0.85}\text{Cs}_{0.15}\text{PbI}_3$  PSC based on (4%) Nb/TiO<sub>x</sub> CL. For pinholes in the HTL, it is expected that they are formed by thermal stress during gold evaporation.<sup>1</sup>

#### Reference

- 1 A. K. Jena, M. Ikegami, and T. Miyasaka, *ACS Energy Lett.*, 2017, **2**, 1760-1761.
